# Supplementary material
Source: publisher site journal article supplement (https://www.dovepress.com/article/216667)
Supplement: Supplementary file 1 [file get_supplementary_file.php]

**Table S1**: Pharmacokinetic parameters of liposomal ZYZ-802 in rats (n=6)

| Parameters | ZYZ-802 | SA-ZYZ-802 | DP-ZYZ-802 |
| --- | --- | --- | --- |
| t1/2 (h) | 3.5±0.7 | 4.8±0.8# | 10.5±1.4#& |
| Cmax (µg/ml) | 9.60±2.26 | 46.18±5.10# | 53.67±8.58# |
| Vd (L/kg) | 0.53±0.24 | 0.23±0.03# | 0.17±0.03#& |
| CL (L/h/kg) | 2.8±0.6 | 3.2±0.5 | 1.5±0.3#& |
| AUC(0-t) (mg/L*h) | 32.6±6.7 | 305.8±44.4# | 646.0±103.7#& |
| AUC(0-∞) (mg/L*h) | 36.8±7.6 | 322.8±46.8# | 682.7±113.7#& |
| MRT(0-t) (h) | 3.7±0.5 | 4.9±0.5# | 11.1±1.0#& |
| #*P*<0.05 vs. ZYZ-802 ; &*P*<0.05 vs. SA-ZYZ-802, calculated by two-tailed Student’s *t* test | | | |

**Table S2**: Tissue ZYZ-802 concentrations at different time points after intravenous injection of ZYZ-802, DP-ZYZ-802 and SA-ZYZ-802 (n=6)

| Time (h) |  | 1 | 6 | 12 | 24 |
| --- | --- | --- | --- | --- | --- |
| Heart | ZYZ-802 | 2.62±0.90 | 0.93±0.67 | 0.24±0.06 |  |
| SA-ZYZ-802 | 5.20±1.07# | 2.37±0.35# | 0.78±0.41# | 0.23±0.04 |
| DP-ZYZ-802 | 5.38±0.57# | 3.34±0.82#& | 1.97±0.46#& | 0.36±0.04& |
| Liver | ZYZ-802 | 2.33±1.02 | 0.78±0.15 | 0.31±0.07 |  |
| SA-ZYZ-802 | 5.42±0.70# | 2.95±1.05# | 0.70±0.13# | 0.22±0.05 |
| DP-ZYZ-802 | 4.71±0.85# | 3.64±1.20# | 2.82±0.88#& | 0.59±0.22& |
| Kidney | ZYZ-802 | 3.23±0.62 | 1.30±0.41 | 0.32±0.06 |  |
| SA-ZYZ-802 | 8.44±1.83# | 7.21±3.23# | 1.50±0.24# | 0.24±0.09 |
| DP-ZYZ-802 | 5.99±1.14#& | 5.73±3.25# | 3.63±0.99#& | 0.37±0.11 |
| Spleen | ZYZ-802 | 2.43±0.59 | 0.68±0.13 | 0.23±0.07 |  |
| SA-ZYZ-802 | 13.35±1.44# | 11.13±2.07# | 3.81±2.03# | 0.65±0.25 |
| DP-ZYZ-802 | 11.63±0.70#& | 9.26±2.15# | 5.38±1.42# | 1.53±0.43& |
| Lung | ZYZ-802 | 2.53±0.47 | 0.66±0.21 | 0.32±0.08 |  |
| SA-ZYZ-802 | 5.20±0.86# | 3.31±1.45# | 0.53±0.26 | 0.39±0.14 |
| DP-ZYZ-802 | 6.82±0.84#& | 3.59±0.81# | 1.82±0.46#& | 0.51±0.14 |
| #*P*<0.05 vs ZYZ-802, &*P*<0.05 vs SA-ZYZ-802, calculated by two-tailed Student’s *t* test | | | | | |

**Table S3**: Plasma H2S concentrations at different time points after intravenous injection of ZYZ-802, DP-ZYZ-802 and SA-ZYZ-802 (n=6)

| Time (h) | ZYZ-802 | SA-ZYZ-802 | DP-ZYZ-802 |
| --- | --- | --- | --- |
| 1 | 1.20±0.36 | 1.32±0.11 | 1.41±0.04& |
| 6 | 1.19±0.35 | 1.44±0.20 | 1.87±0.17#& |
| 12 | 0.87±0.36 | 1.22±0.09 | 1.76±0.32#& |
| 24 | 0.89±0.30 | 1.12±0.24 | 1.69±0.20#& |
| #*P*<0.05 vs ZYZ-802, &*P*<0.05 vs SA-ZYZ-802, calculated by two-tailed Student’s *t* test | | | |

**Table S4**: Tissue H2S concentrations at different time points after intravenous injection of ZYZ-802, DP-ZYZ-802 and SA-ZYZ-802 (n=6)

| Time (h) |  | 1 | 6 | 12 | 24 |
| --- | --- | --- | --- | --- | --- |
| Heart | ZYZ-802 | 123.99±30.45 | 94.44±18.43 | 93.54±13.04 | 70.35±15.58 |
| SA-ZYZ-802 | 140.27±25.59 | 121.44±30.20 | 114.71±11.45# | 107.30±20.08# |
| DP-ZYZ-802 | 191.16±11.68#& | 169.10±30.69#& | 146.57±31.08#& | 118.96±12.65#& |
| Liver | ZYZ-802 | 51.93±19.63 | 43.99±4.01 | 46.13±8.49 | 44.93±10.18 |
| SA-ZYZ-802 | 86.20±24.40# | 68.04±18.30# | 56.11±12.21 | 41.84±5.27 |
| DP-ZYZ-802 | 87.27±18.60# | 87.71±19.27# | 74.47±13.89#& | 66.90±12.54#& |
| Kidney | ZYZ-802 | 94.21±10.69 | 71.16±15.47 | 78.39±12.19 | 77.15±19.52 |
| SA-ZYZ-802 | 155.60±22.68# | 114.17±17.71# | 102.38±8.52# | 85.80±13.21 |
| DP-ZYZ-802 | 147.54±28.35# | 146.17±45.27# | 120.30±15.71#& | 102.82±11.66#& |
| Spleen | ZYZ-802 | 19.16±2.99 | 16.14±1.53 | 15.75±1.38 | 13.24±1.61 |
| SA-ZYZ-802 | 29.75±7.27# | 21.49±3.49# | 16.69±1.69 | 14.46±1.01 |
| DP-ZYZ-802 | 25.95±6.22# | 21.75±5.69# | 21.24±2.66#& | 18.10±3.16#& |
| Lung | ZYZ-802 | 14.74±2.90 | 10.32±1.31 | 8.69±1.09 | 8.00±1.06 |
| SA-ZYZ-802 | 21.05±6.02# | 13.97±3.57# | 11.83±2.56# | 8.56±1.72 |
| DP-ZYZ-802 | 24.11±8.08# | 16.00±4.16# | 12.48±3.22# | 10.19±1.82# |
| #*P*<0.05 vs ZYZ-802 , &*P*<0.05 vs SA-ZYZ-802, calculated by two-tailed Student’s *t* test | | | | | |

**Table S5**: Echocardiographic analysis of cardiac function (n=6)

| Parameters | Sham | HF | DP-LP | ZYZ-802 | DP-ZYZ-802 |
| --- | --- | --- | --- | --- | --- |
| EF(%) | 82.63±3.76 | 45.55±8.29# | 46.92±5.40# | 63.87±4.09* | 74.74±3.79*& |
| FS(%) | 52.80±4.40 | 23.71±4.92# | 24.39±3.26# | 35.95±3.12* | 44.99±3.42*& |
| LVAW.s (mm) | 3.00±0.23 | 2.00±0.42# | 2.05±0.26# | 2.49±0.19* | 3.02±0.11*& |
| LVAW.d (mm) | 1.60±0.14 | 1.62±0.32 | 1.68±0.21 | 1.64±0.05 | 1.80±0.21 |
| LVID.s (mm) | 3.14±0.52 | 5.89±0.54# | 5.59±0.54# | 4.70±0.49* | 3.98±0.42*& |
| LVID.d (mm) | 6.63±0.67 | 7.71±0.47# | 7.39±0.55 | 7.33±0.71 | 7.24±0.43 |
| LVPW.s (mm) | 2.86±0.26 | 2.13±0.25# | 2.52±0.33# | 2.37±0.21 | 2.77±0.20*& |
| LVPW.d (mm) | 1.69±0.15 | 1.71±0.29 | 1.71±0.27 | 1.54±0.21 | 1.58±0.18 |
| LV Vol.s (μl) | 40.61±15.14 | 173.94±37.18# | 154.96±32.88# | 103.54±25.40* | 70.43±17.31*& |
| LV Vol.d (μl) | 228.42±53.24 | 318.94±43.96# | 290.35±47.25 | 286.63±60.33 | 276.31±36.01 |
| #*P*<0.05 compared with sham, **P*<0.05 compared with HF, &*P*<0.05 compared with ZYZ-802, calculated by two-tailed Student’s *t* test | | | | | |
